# Supplementary material for: Anaplasma phagocytophilum infection modulates expression of megakaryocyte cell cycle genes through phosphatidylinositol-3-kinase signaling
Source: PubMed Central journal article supplement (PMC5552339; doi:10.1371/journal.pone.0182898), 2017-08-10
Supplement: pone.0182898.s001.pdf [file pone.0182898.s001.pdf]

***Anaplasma phagocytophilum* infection modulates expression of megakaryocyte cell cycle genes through phosphatidylinositol-3-kinase signaling**

Supreet Khanal <sup>1</sup>, Hameeda Sultana <sup>1,2</sup>, John D. Catravas <sup>3,4</sup>, Jason A. Carlyon <sup>5</sup> and  
Girish Neelakanta <sup>1,2,#</sup>

**Supplementary information**

**Supplementary Figure A. *A. phagocytophilum* loads in HL-60 cells.** QRT-PCR analysis showing *A. phagocytophilum* burden in infected-HL-60 cells before isolation of bacteria. *A. phagocytophilum* specific *p44* DNA levels were normalized to total DNA levels. Uninfected cells were used as negative controls.

**Supplementary Figure B. Inhibition of PI3 kinases by LY294002 treatment at 50  $\mu$ M concentration had no or some cytotoxicity on viability of MEG-01 cells.** Phase contrast microscopic images of *A. phagocytophilum*-infected mock-treated (DMSO) or LY294002-treated (PI3K inhibitor; at 50  $\mu$ M concentration) MEG-01 cells, captured using EVOS FL cell imaging system (Invitrogen, USA) on different days (1 and 7 p.i.) are shown. Two images from each group and at each time point are shown. Scale bar represents 200  $\mu$ m.

**Supplementary Figure C. Amplification of cell cycle genes by polymerase chain reaction (PCR).** Agarose gel images showing products from PCR amplification of cell

cycle genes or human beta actin for the generation of QRT-PCR standards. Total RNA generated from uninfected (UI) MEG-01 cells was converted to cDNA and used as template for generation of these fragments. Primers specific for each gene are shown in Supplementary table 1. NTC indicates no template control.

**Supplementary Figure D. Viability of MEG-01 cells upon *A. phagocytophilum* infection.** Trypan blue staining results performed with uninfected or *A. phagocytophilum*-infected MEG-01 cells at different days (1, 3, 5, 7) p.i is shown. Values on the Y-axis show the percentage of live cells. The percentage data is the average reading of 24 microscopic fields obtained from 3 wells per group. The P value ( $P < 0.05$ ) calculated from Student's t test was considered significant.

**Supplementary Figure E. Expression of housekeeping genes upon *A. phagocytophilum* infection of MEG-01 cells.** QRT-PCR analysis showing levels of actin, GAPDH, beta-tubulin and glucose-6-isomerase in uninfected (UI) and *A. phagocytophilum*-infected (I) MEG-01 cells at days 1 and 7 p.i. The mRNA levels of human beta-actin were normalized to total RNA levels. The mRNA levels of other three genes were normalized to human beta-actin mRNA levels. ns indicates no significance ( $P > 0.05$ ) calculated from Student's t test.

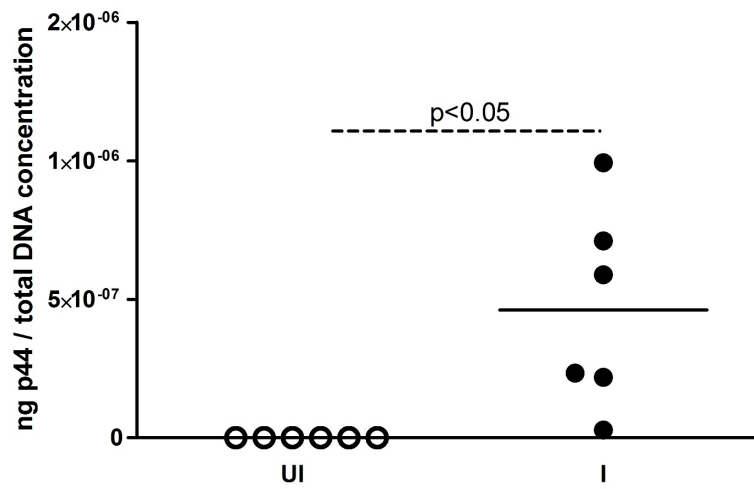

Supplementary Figure A

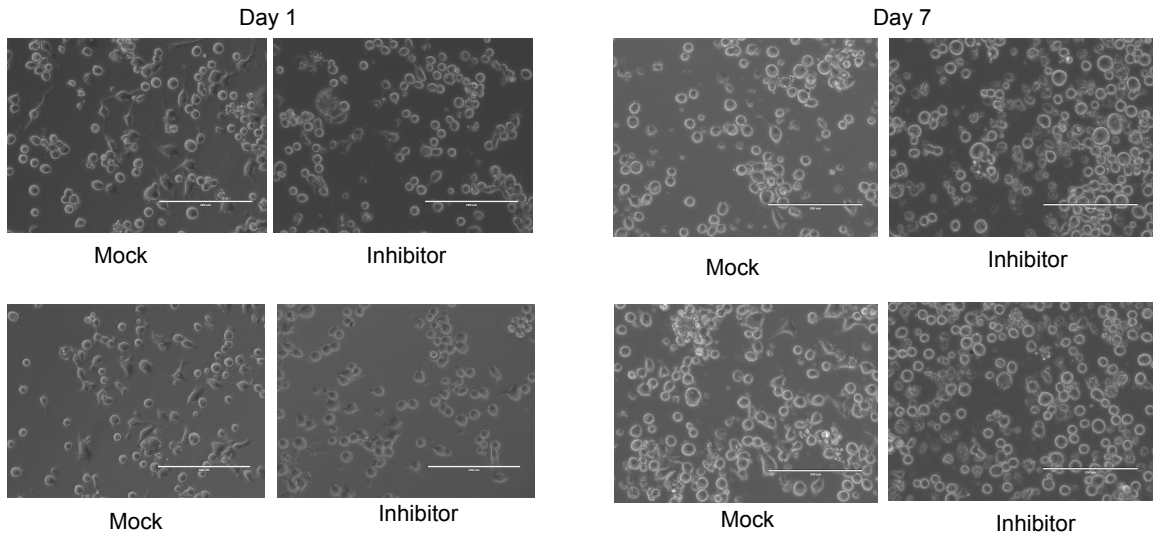

Supplementary Figure B

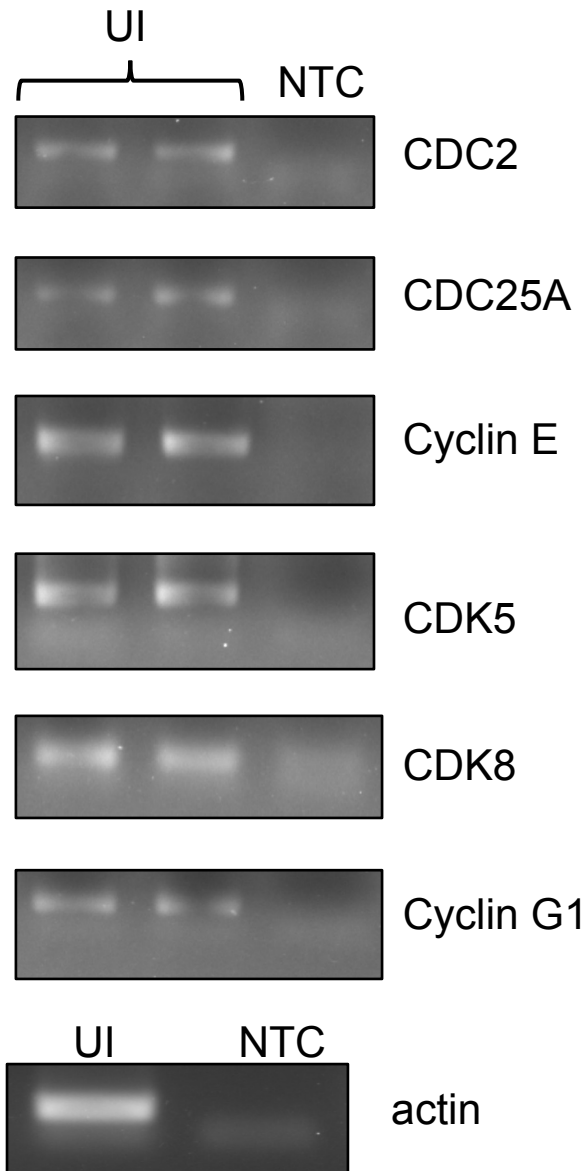

Supplementary Figure C

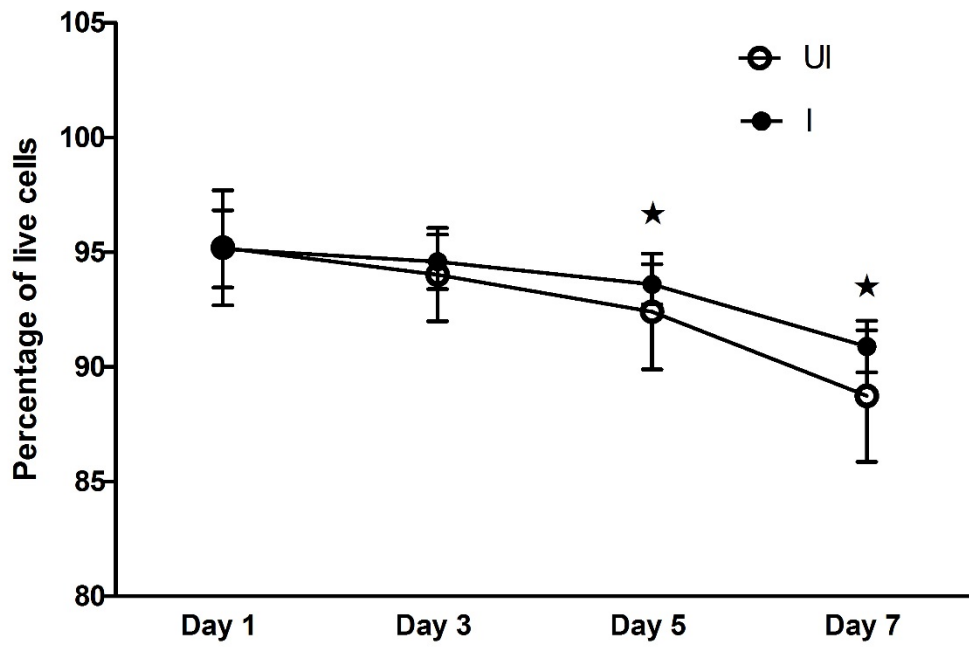

Supplementary Figure D

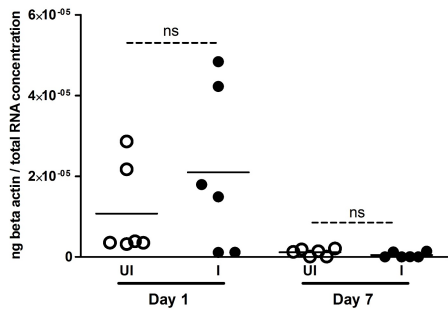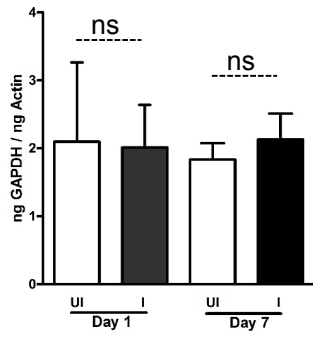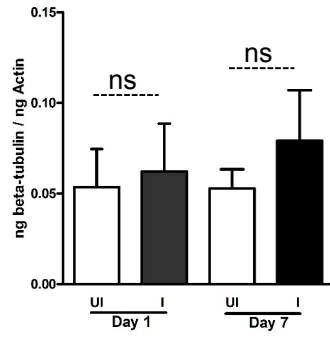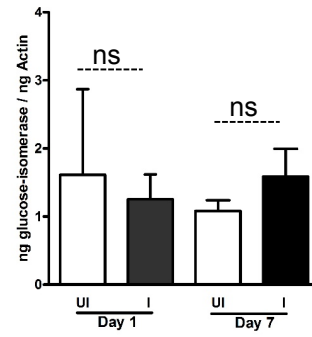

Supplementary Figure E

**Supplementary Table A:** Primer sequences used in QRT-PCR analysis

| <b>Primer sequence (5'-3')</b>                              | <b>gene, purpose</b>                |
|-------------------------------------------------------------|-------------------------------------|
| AAACTACAGGTCAAGTGGTAGCC<br>AATCCTGCATAAGCACATCC             | CDC2, qPCR                          |
| GTGAAGGCGCTATTTGGCG<br>GGTCCATAGTGACGGTCAGGT                | CDC25A, qPCR                        |
| GTTATAAGGGAGACGGGGAG<br>TGCTCTGCTTCTTACCGCTC                | Cyclin E, qPCR                      |
| AGAGGAGCCGACCCGTTGC<br>TCCATTCCCCACCTTCTTCCC                | CDK5, qPCR                          |
| GGGATCTCTATGTCGGCATGTAG<br>AAATGACGTTTGGATGCTTAAGC          | CDK8, qPCR                          |
| TTCCAAGATA AATGGCAGAG<br>GCAGTACGCCAGAAACA                  | Cyclin G1, qPCR                     |
| AGCCTCGCCTTTGCCGA<br>CTGGTGCCTGGGGCG                        | Actin, qPCR                         |
| CCAGCGTTTAGCAAGATAAGAG<br>GCCAGTAACAACATCATAAGC             | <i>Anaplasma p44 gene</i> ,<br>qPCR |
| ACAGTCCATGCCATCACTGCC<br>GCCTGCTTCACCACCTTCTTG              | GAPDH, qPCR                         |
| GCATTCGATCTAGCAAATTAGGAGCTC<br>CTCAATCAGCTGGTGGATAGACAGAACC | Beta-1-tubulin, qPCR                |
| AGGCTGCTGCCACATAAGGT<br>CCAAGGCTCCAAGCATGAAT                | Glucose-6-isomerase,<br>qPCR        |
